# Supplementary material for: Techno-Economic Assessment of Biological Biogas Upgrading Based on Danish Biogas Plants
Source: MDPI journal article supplement (doi:10.3390/en14248252), 2021-12-08
Supplement: s1 [file s1]

Archive with 1 entries (1 files):
- energies-1483686-SI.pdf
