# Supplementary material for: Techno-Economic Assessment of Biological Biogas Upgrading Based on Danish Biogas Plants
Source: MDPI journal article supplement (doi:10.3390/en14248252), 2021-12-08
Supplement: s1 [file s1 › energies-1483686-SI.pdf]

## **Supplementary Material**

### **Techno-economic assessment of biological biogas upgrading based on Danish biogas plants**

Néméhie Lawson<sup>1</sup>, Merlin Alvarado-Morales<sup>\*,1</sup>, Panagiotis Tsapekos<sup>\*</sup>,  
Irina Angelidaki

Department of Chemical and Biochemical Engineering, Technical  
University of Denmark, Kgs. Lyngby, DK-2800, Denmark

<sup>1</sup>These authors contributed equally to the present work.

<sup>\*</sup>Corresponding authors: Merlin Alvarado-Morales ([meal@kt.dtu.dk](mailto:meal@kt.dtu.dk)) Panagiotis Tsapekos  
([pts@kt.dtu.dk](mailto:pts@kt.dtu.dk)), Department of Chemical and Biochemical Engineering, Technical  
University of Denmark

## I. Equipment cost

Equipment cost was calculated by the following equation [1]

$$C_e = a + b S^n$$

where  $C_e$  is the equipment cost,  $S$  is the equipment size,  $n$  is the economy of scale sizing exponent, and  $a$  and  $b$  are shown in Table S1.

**Table S1.** Correlation coefficient ( $a$  and  $b$ ) and boundaries values ( $S_{lower}$  and  $S_{upper}$ ) for each equipment type.

| Equipment size                       | Units in the plant                                        | Unit for size, $S$       | $S_{lower}$ | $S_{upper}$ | $a$     | $b$  | $n$ |
|--------------------------------------|-----------------------------------------------------------|--------------------------|-------------|-------------|---------|------|-----|
| Floating rooftank                    | Digester, storage tanks                                   | Capacity, m <sup>3</sup> | 100         | 10,000      | 53,000  | 2400 | 0.6 |
| Pressure vessel, 304 stainless steel | Upgrading and desulphurization reactors, hydrogen storage | Shell mass, kg           | 90          | 124,200     | -10,000 | 600  | 0.6 |
| Double pipe heat exchanger           | Heat exchangers                                           | Area, m <sup>2</sup>     | 1           | 80          | 500     | 1100 | 1   |
| Centrifugal single-stage pumps       | Pumps                                                     | Flow, l/s                | 0.2         | 500         | 3300    | 48   | 1.2 |

For the remaining equipment *i.e.* the packing material and the compressor, the following calculations were carried out. A price of 30 €/m<sup>3</sup> was retrieved from literature [2] and was multiplied by the volume of PUF in the different reactors.

For the compressor, the cost was assessed based on the power using data from Brown et al. [3] and the following equation:

$$C_e = C_{base} \left( \frac{S}{S_{base}} \right)^n$$

Where  $C_e$  is the compressor cost,  $C_{base}$  is the cost for a compressor with a base size  $S_{base}$ , in this case, 1 kW, and  $n$  the economy of scale exponent.

**Table S2.** Equipment cost breakdown

| <b>Anaerobic digestion (AD) equipment</b> | <b>€ × 10<sup>3</sup></b> | <b>kr × 10<sup>3</sup></b> |
|-------------------------------------------|---------------------------|----------------------------|
| Storage tank for manure                   | 271                       | 2020                       |
| Storage tank for industrial waste         | 168                       | 1254                       |
| Pump and mixer                            | 4                         | 29                         |
| HEX                                       | 8                         | 57                         |
| Digester                                  | 534                       | 3976                       |
| Digestate storage tank                    | 135                       | 1003                       |
| <b>Total cost for AD</b>                  | <b>1119</b>               | <b>8338</b>                |
|                                           |                           |                            |
| <b>Desulphurization equipment</b>         | <b>€ × 10<sup>3</sup></b> | <b>kr × 10<sup>3</sup></b> |
| Reactor                                   | 244                       | 1818                       |
| Packing material                          | 21                        | 159                        |
| <b>Total cost for desulphurization</b>    | <b>265</b>                | <b>1977</b>                |
|                                           | <b>1385</b>               | <b>10315</b>               |
|                                           |                           |                            |
| <b>Upgrading equipment</b>                | <b>€ × 10<sup>3</sup></b> | <b>kr × 10<sup>3</sup></b> |
| H <sub>2</sub> storage                    | 539                       | 4018                       |
| HEX                                       | 2                         | 14                         |
| Pump and mixer                            | 70                        | 521                        |
| Nutrient storage                          | 45                        | 339                        |
| Upgrading reactor                         | 211                       | 1570                       |
| Packing material                          | 18                        | 132                        |
| Compressor                                | 55                        | 408                        |
| <b>Total cost for upgrading</b>           | <b>939</b>                | <b>7002</b>                |
| <b>Total equipment cost</b>               | <b>2324</b>               | <b>17317</b>               |

## II. Operational cost

The operational costs were calculated by the following equation

$$OC = \sum_{j=0}^m P_j Q_j + N_{op} S_{op} + \sum_{k=0}^u P_k Q_k$$

where  $m$  is the number of raw materials and  $P_j$  is the price of the different raw materials (manure, hydrogen, etc),  $Q_j$  is their respective quantities in ton or kg.  $N_{op}$  is the number of operators per shift and  $S_{op}$  is the salary per hour and per operator,  $u$  is the number of utilities and  $P_k$  is the price of utilities (electricity, steam, etc) while  $Q_k$  is their quantities in kWh or tons/year. The detail of prices is given in the sections below.

### Raw materials

The assumptions for the raw material costs are displayed below.

- Manure is assumed to be free of charge whether digestate is sold or not
- Manure transport is assumed to be included in biogas plants costs. An inventory of a few large-scale Danish plants show that the distance to manure suppliers is not higher than 20 km which is a short distance [4]. The price for manure transport is fixed and equal to 2.5 €/ton of manure [5].
- Industrial waste cost is assessed according to the waste management price that companies need to pay but also on suggested prices by other feasibility studies. Industrial waste is set to 30 €/ton [5,6].
- Inoculum and nutrients for AD, desulphurization, and upgrading are assumed to be free of charge. Manure can be used as a nutrient media when prepared adequately [7].
- Oxygen is needed for H<sub>2</sub>S removal. Towler et al.[1] indicate an oxygen price of 0.02 USD/lb in 2006 *i.e.* 0.05 €/kg of oxygen in 2019.

### Hydrogen cost

Hydrogen is also a raw material however its cost depends on numerous parameters since its production is done via water electrolysis. Hydrogen can be as cheap as 1 to 1.5 €/kg yet NREL (National Renewable Energy Laboratory) and Vo et al. report a price that can be higher than 5 USD/kg (4.5 €/kg) [8,9]. The International Energy Agency in 2017 published a report where the hydrogen cost evolution is given for different electricity prices and full load hours [10].

Fig. S1 illustrates that the price of hydrogen is the lowest when the electricity price is 0 *i.e.* when there is a surplus of electricity. Thus the blue curve corresponds to the price range to consider since the goal of using H<sub>2</sub> is to reduce curtailment caused by electricity overproduction. One assumes that the full load hours is maximum and thus a price of 1.0 €/kg of H<sub>2</sub> is used.

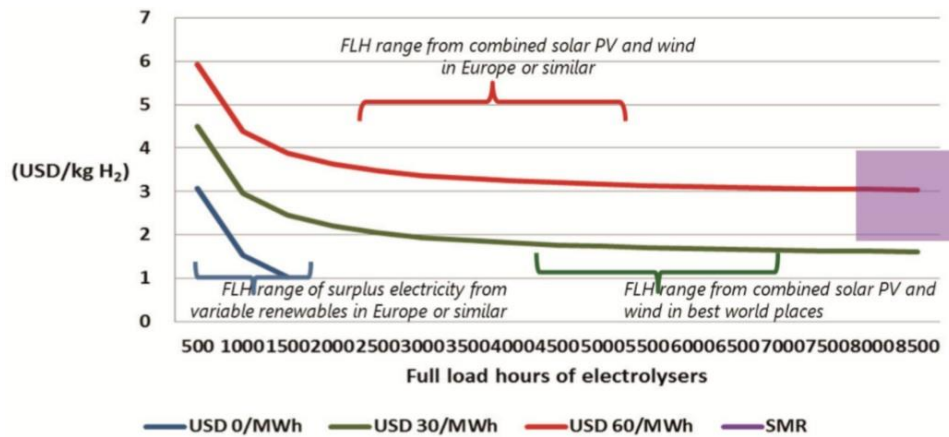

**Figure S1.** Cost of hydrogen from electrolysis for different electricity costs and load factors [10] Note: Assumptions - Capex of electrolyzers USD 450/kW (Simonsen, 2017), WACC 7%, lifetime 30 years, efficiency 70%; cost of hydrogen from SMR (Steam Reforming) USD 1.0/kgH<sub>2</sub> to USD 3.0/kgH<sub>2</sub> depending on natural gas prices.

## Utilities

Biogas heat and electricity needs can be provided by an on-site CHP plant. If it is not the case the electricity can be bought from the grid and other utilities like steam can be provided by an over-the-fence plant. The price of steam, water, and cooling was taken into account in this study case.

- The electricity price for large consumers is lower compared to retail prices. From the first estimation, the plant consumes between 2 and 499 MWh. According to official data from Danish authorities, the electricity price is 0.731 DKK/kWh tax included (0.1 €/kWh) [11].
- Steam and cooling water are retrieved from SuperPro Designer software [12] and are respectively equal to 89.40 DKK/t and 0.37 DKK/t (12 €/t and 0.05 €/m<sup>3</sup>)
- Water price is taken from Towler et al. and is equal to 4.53 DKK/m<sup>3</sup> (0.61 €/m<sup>3</sup>) [1].

## Summary of the unit costs for operational expenses

**Table S3** summarises all the different unit cost for raw materials, utilities, and operating labor.

**Table S3.** Unit cost for operational expenses

|                               | Price | Unit             |
|-------------------------------|-------|------------------|
| <b><i>Raw materials</i></b>   |       |                  |
| Manure                        | 0     | €/t              |
| Manure transport              | 2.50  | €/t              |
| Industrial waste              | 30    | €/t              |
| Hydrogen                      | 1     | €/kg             |
| Inoculum and nutrients        | 0     | €/kg             |
| Oxygen                        | 0.05  | €/kg             |
| <b><i>Utilities</i></b>       |       |                  |
| Electricity                   | 0.098 | €/kWh            |
| Steam                         | 12    | €/t              |
| Cooling water                 | 0.05  | €/m <sup>3</sup> |
| Water                         | 0.61  | €/m <sup>3</sup> |
| <b><i>Operating labor</i></b> |       |                  |
| Operator                      | 24.2  | €/h/operator     |

## Total product cost

On top of the raw materials, operating labor, and utility costs there are other costs incurred to run a plant. These different costs are listed in **Table S4** and details are provided on how these costs are calculated. This cost estimation method is applied for each section of the plant e.g. AD, H<sub>2</sub>S removal, and upgrading.

**Table S4.** Fixed cost calculation factors

|                                                | Factor | Basis                                                                |
|------------------------------------------------|--------|----------------------------------------------------------------------|
| Supervision ( <i>S</i> )                       | 0.25   | of operating labor                                                   |
| Direct salary overhead ( <i>DSO</i> )          | 0.40   | of operating labor and supervision                                   |
| Maintenance ( <i>M</i> )                       | 0.03   | of TPEC                                                              |
| Property taxes and insurance ( <i>PTI</i> )    | 0.015  | of FCI                                                               |
| Rent of land and buildings ( <i>RLB</i> )      | 0.01   | of 83% of FCI                                                        |
| General plant overhead ( <i>GPO</i> )          | 0.65   | of total labor (incl. supervision, direct overhead, and maintenance) |
| Allocated environmental burdens ( <i>AEB</i> ) | 0.01   | of 83% of FCI                                                        |

The total product cost is calculated by the following equation

$$TPC = M + U + O + S + DSO + MT + PTI + RLB + GPO + AEB$$

and using the factors in Table S4, we have,

$$TPC = M + U + O + 0.25O + 0.4(O + S) + 0.03TPEC + 0.015FCI + 0.01 \times 0.83FCI \\ + 0.65(S + DSO + MT) + 0.1 \times 0.83FCI$$

where  $M$ ,  $U$ , and  $O$  are respectively the raw materials, the utility, and the operating labor costs.

### Tax, depreciation, inflation, and minimum rate of return

In many countries, corporate income is subject to taxation. In Denmark, the corporate income tax rate is 22% [13]. Biogas installations depreciation is straight-line, this means that the value of an asset is assumed to decrease equally each year. Since the lifetime is 20 years and assuming that at the end of the project the asset value is zero the depreciation factor is 5%. Inflation also needs to be taken into account. The projected inflation for 2020 and 2021 is 1.2% [14]. Finally, the minimum rate of return also called discount rate (noted  $r$ ) indicates the required rate of return by the investor. The higher the risk of a project the higher the discount rate. The anaerobic digestion process is well-known, in many feasibility studies, the discount rate ranges from 5 to 8% [12,15,16], which means that the investment is safe. For biogas plants that inject biomethane into the grid the minimum rate of return is generally higher [17]. Here an established technology (biotrickling filter) is used for a new application which is biogas upgrading to biomethane, hence a discount rate of 10% was selected.

### III. Mass balance flowsheets

#### Base case design

**Table S5.** List of compounds involved in the simulation of the base case design [18]

| <i>Compound</i>         | <i>Model formula</i>                | PROII<br>databanks | User-<br>defined |
|-------------------------|-------------------------------------|--------------------|------------------|
| Insoluble carbohydrates | $C_6H_{10}O_5$                      |                    | ✓                |
| Soluble carbohydrates   | $C_6H_{10}O_5$                      |                    | ✓                |
| Innert carbohydrates    | $C_6H_{10}O_5$                      |                    | ✓                |
| Insoluble proteins      | $CH_{2.03}O_{0.6}N_{0.3}S_{0.0001}$ |                    | ✓                |
| Soluble proteins        | $CH_{2.03}O_{0.6}N_{0.3}S_{0.0001}$ |                    | ✓                |
| Innert proteins         | $CH_{2.03}O_{0.6}N_{0.3}S_{0.0001}$ |                    | ✓                |
| Insoluble lipids        | $C_{57}H_{104}O_6$                  |                    | ✓                |
| Soluble lipids          | $C_{57}H_{104}O_6$                  |                    | ✓                |
| Innert lipids           | $C_{57}H_{104}O_6$                  |                    | ✓                |
| LCFA                    | $C_{18}H_{34}O_2$                   | ✓                  |                  |
| Ammonia (nutrients)     | $NH_3$                              | ✓                  |                  |
| Acetic acid             | $C_2H_4O_2$                         | ✓                  |                  |
| Propionic acid          | $C_3H_6O_2$                         | ✓                  |                  |
| Lactic acid             | $C_3H_6O_3$                         | ✓                  |                  |
| Butyric acid            | $C_4H_8O_4$                         | ✓                  |                  |
| Valeric acid            | $C_5H_{10}O_2$                      | ✓                  |                  |
| Cell mass               | $C_5H_7O_2N$                        |                    | ✓                |
| Water                   | $H_2O$                              | ✓                  |                  |
| Methane                 | $CH_4$                              | ✓                  |                  |
| Carbon dioxide          | $CO_2$                              | ✓                  |                  |
| Hydrogen                | $H_2$                               | ✓                  |                  |
| Sulfur hydrogen         | $H_2S$                              | ✓                  |                  |

**Table S6.** Mass balance for the base case scenario

| Stream                             | UOM    | S3       | S4       | S5     | S6    | S7    | S8     | S9     | S10    |
|------------------------------------|--------|----------|----------|--------|-------|-------|--------|--------|--------|
| Total Molar Rate                   | kmol/h | 612.75   | 600.95   | 21.99  | 29.33 | 0.18  | 51.51  | 15.04  | 21.79  |
| Total Mass Rate                    | kg/h   | 12077.29 | 11509.56 | 567.70 | 59.13 | 3.10  | 629.93 | 293.98 | 335.95 |
| Temperature                        | C      | 55.00    | 55.00    | 55.00  | 55.00 | 55.00 | 54.91  | 54.91  | 54.91  |
| Pressure                           | atm    | 1.00     | 1.00     | 1.00   | 1.00  | 1.00  | 1.00   | 1.00   | 1.00   |
| Total Molecular Weight             |        | 19.71    | 19.15    | 25.81  | 2.02  | 17.03 | 12.23  | 19.55  | 15.42  |
| <b>Total Molar Component Rates</b> | kmol/h |          |          |        |       |       |        |        |        |
| Insoluble carbohydrates            |        | 1.31     | 0        | 0      | 0     | 0     | 0      | 0      | 0      |
| Soluble carbohydrates              |        | 1.71     | 0.01     | 0      | 0     | 0     | 0      | 0      | 0      |
| Innert carbohydrate fraction       |        | 0.18     | 0.37     | 0      | 0     | 0     | 0      | 0      | 0      |
| Insoluble proteins                 |        | 5.86     | 0        | 0      | 0     | 0     | 0      | 0      | 0      |
| Soluble proteins                   |        | 0.49     | 0.03     | 0      | 0     | 0     | 0      | 0      | 0      |
| Innert protein fraction            |        | 0        | 0.88     | 0      | 0     | 0     | 0      | 0      | 0      |
| Insoluble lipids                   |        | 0.03     | 0        | 0      | 0     | 0     | 0      | 0      | 0      |
| Soluble lipids                     |        | 0.31     | 0.03     | 0      | 0     | 0     | 0      | 0      | 0      |
| Innert lipid fraction              |        | 0        | 0.01     | 0      | 0     | 0     | 0      | 0      | 0      |
| LCFA                               |        | 0.16     | 0.00     | 0      | 0     | 0     | 0      | 0      | 0      |
| Ammonia                            |        | 1.43     | 1.78     | 0      | 0     | 0.18  | 0.18   | 0.00   | 0      |
| Acetic acid                        |        | 1.20     | 10.14    | 0      | 0     | 0     | 0      | 0.15   | 0      |
| Propionic acid                     |        | 0.27     | 0.01     | 0      | 0     | 0     | 0      | 0      | 0      |
| Lactic acid                        |        | 0.34     | 0.00     | 0      | 0     | 0     | 0      | 0      | 0      |
| Butyric acid                       |        | 0.13     | 0.01     | 0      | 0     | 0     | 0      | 0      | 0      |
| Valeric acid                       |        | 0.06     | 0.00     | 0      | 0     | 0     | 0      | 0      | 0      |
| Biomass                            |        | 0.01     | 1.30     | 0      | 0     | 0     | 0      | 0.18   | 0      |
| Water                              |        | 596.28   | 585.02   | 0      | 0     | 0     | 0      | 14.71  | 0      |
| Methane                            |        | 0        | 0        | 14.31  | 0     | 0     | 14.31  | 0      | 20.81  |
| CO2                                |        | 2.98     | 1.36     | 7.68   | 0     | 0     | 7.68   | 0      | 0      |
| H2                                 |        | 0        | 0        | 0      | 29.33 | 0     | 29.33  | 0      | 0.97   |
| H2S                                |        | 0        | 0        | 0.01   | 0     | 0     | 0.01   | 0      | 0.01   |

250,000 tonnes of substrate capacity

**Table S7.** Mass balance for scenario 3

| Stream                             | UOM    | S3       | S4       | S5      | S6     | S7    | S8      | S9     | S10    |
|------------------------------------|--------|----------|----------|---------|--------|-------|---------|--------|--------|
| Total Molar Rate                   | kmol/h | 1531.86  | 1502.36  | 54.98   | 72.61  | 0.44  | 128.03  | 37.59  | 53.74  |
| Total Mass Rate                    | kg/h   | 30193.24 | 28773.91 | 1419.25 | 146.37 | 7.58  | 1573.19 | 734.77 | 838.42 |
| Temperature                        | C      | 55.00    | 55.00    | 55.00   | 55.00  | 55.00 | 54.91   | 54.91  | 54.91  |
| Pressure                           | atm    | 1.00     | 1.00     | 1.00    | 1.00   | 1.00  | 1.00    | 1.00   | 1.00   |
| Total Molecular Weight             |        | 19.71    | 19.15    | 25.81   | 2.02   | 17.03 | 12.29   | 19.55  | 15.60  |
| <b>Total Molar Component Rates</b> | kmol/h |          |          |         |        |       |         |        |        |
| Insoluble carbohydrates            |        | 3.28     | 0        | 0       | 0      | 0     | 0       | 0      | 0      |
| Soluble carbohydrates              |        | 4.27     | 0.04     | 0       | 0      | 0     | 0       | 0      | 0      |
| Innert carbohydrate fraction       |        | 0.44     | 0.93     | 0       | 0      | 0     | 0       | 0      | 0      |
| Insoluble proteins                 |        | 14.65    | 0        | 0       | 0      | 0     | 0       | 0      | 0      |
| Soluble proteins                   |        | 1.23     | 0.07     | 0       | 0      | 0     | 0       | 0      | 0      |
| Innert protein fraction            |        | 0        | 2.20     | 0       | 0      | 0     | 0       | 0      | 0      |
| Insoluble lipids                   |        | 0.07     | 0        | 0       | 0      | 0     | 0       | 0      | 0      |
| Soluble lipids                     |        | 0.77     | 0.08     | 0       | 0      | 0     | 0       | 0      | 0      |
| Innert lipid fraction              |        | 0        | 0.01     | 0       | 0      | 0     | 0       | 0      | 0      |
| LCFA                               |        | 0.39     | 0.01     | 0       | 0      | 0     | 0       | 0      | 0      |
| Ammonia                            |        | 3.58     | 4.45     | 0       | 0      | 0.44  | 0.44    | 0      | 0      |
| Acetic acid                        |        | 2.99     | 25.34    | 0       | 0      | 0     | 0       | 0.36   | 0      |
| Propionic acid                     |        | 0.67     | 0.03     | 0       | 0      | 0     | 0       | 0      | 0      |
| Lactic acid                        |        | 0.86     | 0.00     | 0       | 0      | 0     | 0       | 0      | 0      |
| Butyric acid                       |        | 0.34     | 0.02     | 0       | 0      | 0     | 0       | 0      | 0      |
| Valeric acid                       |        | 0.15     | 0.00     | 0       | 0      | 0     | 0       | 0      | 0      |
| Biomass                            |        | 0.03     | 3.25     | 0       | 0      | 0     | 0       | 0.44   | 0      |
| Water                              |        | 1490.69  | 1462.55  | 0       | 0      | 0     | 0       | 36.78  | 0      |
| Methane                            |        | 0        | 0        | 35.77   | 0      | 0     | 35.77   | 0      | 52.02  |
| CO2                                |        | 7.44     | 3.39     | 19.20   | 0      | 0     | 19.20   | 0      | 0      |
| H2                                 |        | 0        | 0        | 0       | 72.61  | 0     | 72.61   | 0      | 1.711  |
| H2S                                |        | 0        | 0        | 0.014   | 0      | 0     | 0.01    | 0      | 0.014  |

#### IV. H<sub>2</sub> maximum price for different *PBP*

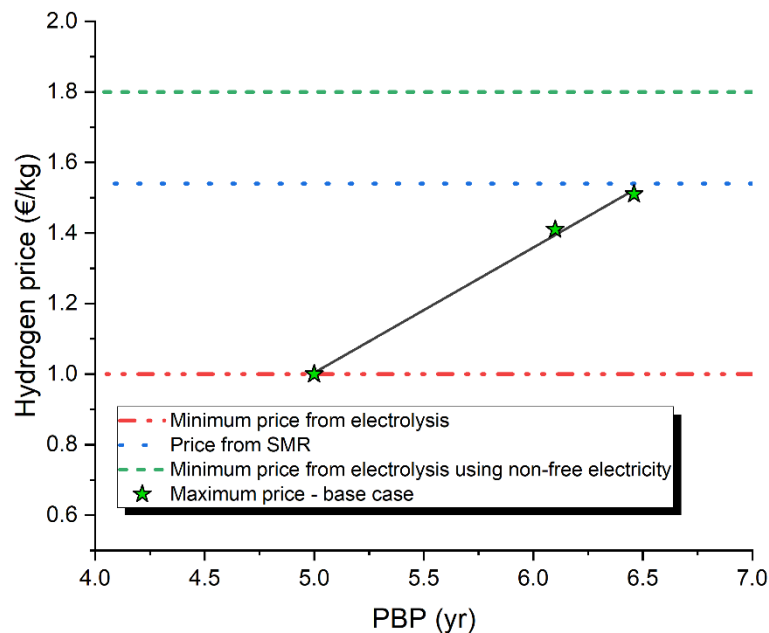

**Figure S2** H<sub>2</sub> maximum price estimated in this study for different *PBP* and H<sub>2</sub> price range from electrolysis and SMR

#### References

- [1] G. Towler, R.K. Sinnott, Chemical Engineering Design - Principles, Practice and Economics of Plant and Process Design (2nd Edition), 2013.
- [2] C. Kennes, M.C. Veiga, Air Pollution Prevention and Control: Bioreactors and Bioenergy, 2013. <https://doi.org/10.1002/9781118523360>.
- [3] R.C. Brown, T.R. Brown, Biorenewable Resources: Engineering New Products from Agriculture: Second Edition, 2014. <https://doi.org/10.1002/9781118524985>.
- [4] B. Harder, B.L. Ramírez Higareda, R. Leyva Huitrón, R. Chimil Molina, J.E. López Hernández, Biogas plants in Denmark and Mexico, 2017.
- [5] M. Garbs, J. Geldermann, Analysis of selected economic and environmental impacts of long distance manure transports to biogas plants, Biomass and Bioenergy. (2018). <https://doi.org/10.1016/j.biombioe.2017.12.009>.
- [6] <https://recoverusa.com/industrial-waste-management/>, Ind. Waste Manag. Waste Stream Stat. (2017).
- [7] M.U. Sieborg, B.D. Jønson, M.T. Ashraf, L. Yde, J.M. Triolo, Biomethanation in a thermophilic biotrickling filter using cattle manure as nutrient media, Bioresour. Technol. Reports. (2020). <https://doi.org/10.1016/j.biteb.2020.100391>.

- [8] T.T.Q. Vo, A. Xia, D.M. Wall, J.D. Murphy, Use of surplus wind electricity in Ireland to produce compressed renewable gaseous transport fuel through biological power to gas systems, *Renew. Energy*. (2017). <https://doi.org/10.1016/j.renene.2016.12.084>.
- [9] G. Saur, C. Ainscough, U.S. Geographic Analysis of the Cost of Hydrogen from Electrolysis, Golden, Colorado, 2011.
- [10] C. Philibert, Renewable energy for industry, Int. Energy Agency. (2018).
- [11] Electricity and natural gas prices, *Electr. Nat. Gas Prices*. (n.d.). <https://www.dst.dk/en/Statistik/emner/miljoe-og-energi/energiforbrug-og-energipriser/el-og-naturgaspriser> (accessed November 7, 2021).
- [12] T.T.Q. Vo, D.M. Wall, D. Ring, K. Rajendran, J.D. Murphy, Techno-economic analysis of biogas upgrading via amine scrubber, carbon capture and ex-situ methanation, *Appl. Energy*. (2018). <https://doi.org/10.1016/j.apenergy.2017.12.099>.
- [13] <https://tradingeconomics.com/denmark/corporate-tax-rate>, (n.d.). <https://tradingeconomics.com/denmark/corporate-tax-rate> (accessed November 7, 2021).
- [14] <https://www.statista.com/statistics/318356/inflation-rate-in-denmark/>, <https://www.statista.com/statistics/318356/inflation-rate-in-denmark/>. (n.d.).
- [15] S. Achinas, G.J.W. Euverink, Feasibility study of biogas production from hardly degradable material in co-inoculated bioreactor, *Energies*. (2019). <https://doi.org/10.3390/en12061040>.
- [16] W.M. Budzianowski, D.A. Budzianowska, Economic analysis of biomethane and bioelectricity generation from biogas using different support schemes and plant configurations, *Energy*. (2015). <https://doi.org/10.1016/j.energy.2015.05.104>.
- [17] R.M. Leme, J.E.A. Seabra, Technical-economic assessment of different biogas upgrading routes from vinasse anaerobic digestion in the Brazilian bioethanol industry, *Energy*. (2017). <https://doi.org/10.1016/j.energy.2016.11.029>.
